# Supplementary material for: The role of XPB/Ssl2 dsDNA translocation processivity in transcription-start-site scanning
Source: bioRxiv or medRxiv preprint supplement (doi:10.1101/2020.11.09.375329), 2020-11-09
Supplement: Supplementary file [file media-1.pdf]

# SUPPLEMENTAL INFORMATION

## **The role of XPB/Ssl2 dsDNA translocation processivity in transcription-start-site scanning.**

### Authors:

Eric J. Tomko<sup>1</sup>, Olivia Luyties<sup>2</sup>, Jenna K. Rimel<sup>2</sup>, Chi-Lin Tsai<sup>4</sup>, Jill O. Fuss<sup>5</sup>, James Fishburn<sup>3</sup>, Steven Hahn<sup>3</sup>, Susan E. Tsutakawa<sup>5</sup>, Dylan J. Taatjes<sup>2</sup> and Eric A. Galburt<sup>\*1</sup>

\* To whom correspondence should be addressed. Tel: (314)362-5201 Email: [egalburt@wustl.edu](mailto:egalburt@wustl.edu)

### Affiliations:

<sup>1</sup> Biochemistry and Molecular Biophysics, Washington University School of Medicine, St. Louis, MO 63110, USA

<sup>2</sup> Dept. of Biochemistry, University of Colorado, Boulder, CO 80303, USA.

<sup>3</sup> Division of Basic Sciences, Fred Hutchinson Cancer Research Center, Seattle, WA 98109, USA

<sup>4</sup> Department of Molecular and Cellular Oncology, The University of Texas MD Anderson Cancer Center, Houston, TX, 77030, USA

<sup>5</sup> Molecular Biophysics and Integrated Bioimaging, Lawrence Berkeley National Laboratory, Berkeley, CA, 94720, USA

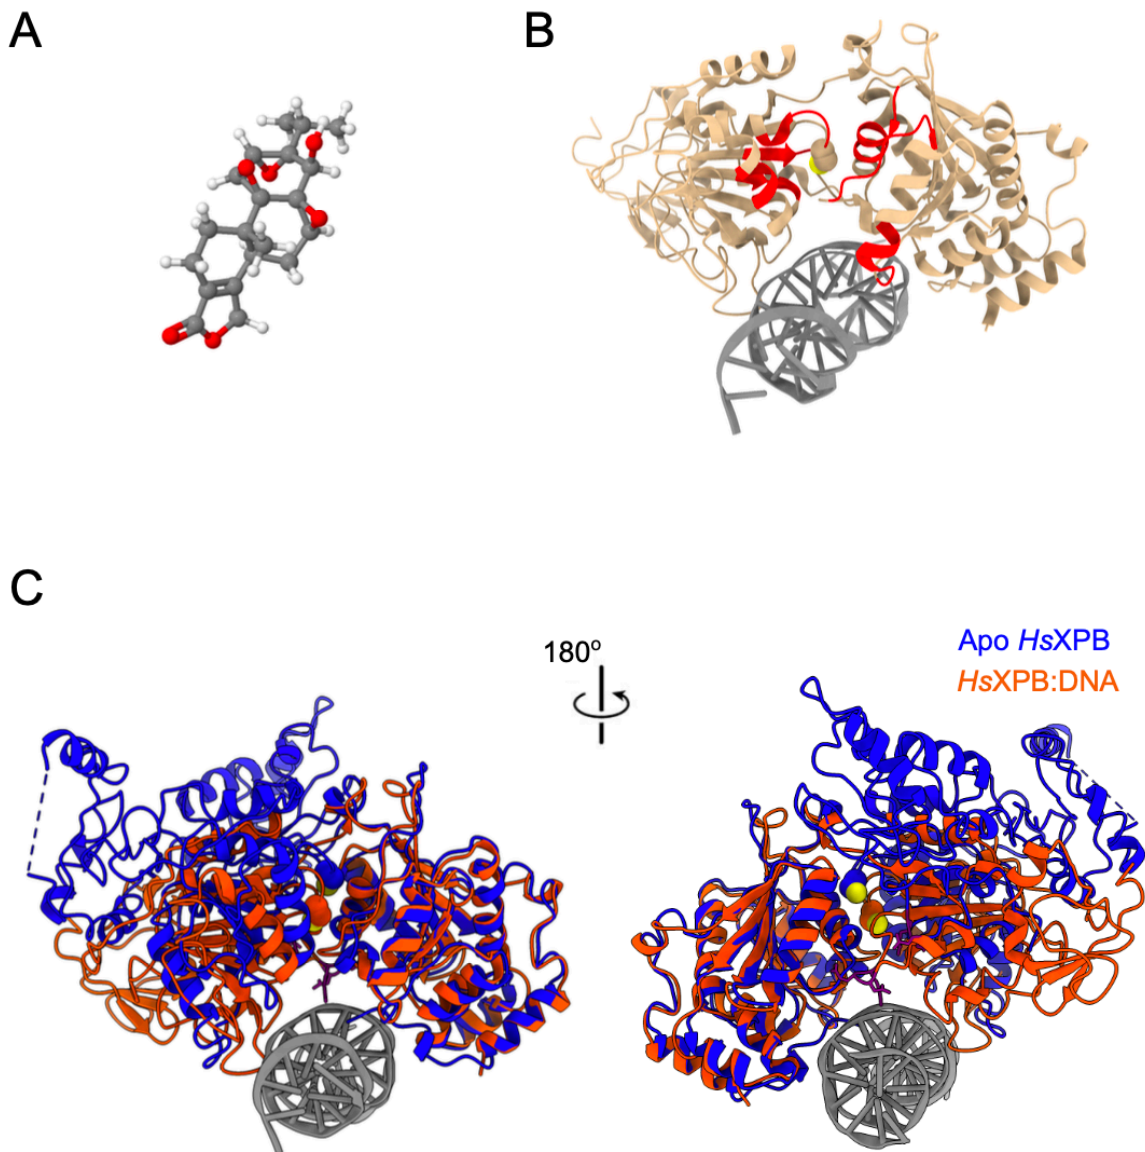

**Figure S1. Site of triptolide modification on XPB potentially disrupts ATP binding site and can be blocked by DNA binding.** (A) Molecular structure of triptolide. (B) *HsXPB* substructure bound to duplex DNA from the *HsPIC* structure[17] (PDB: 5ivw). Residue C342 of XPB is shown in space fill and is the site of triptolide modification[26]. XBP structure in red are the conserved motifs found in DNA-stimulated ATPases that generally comprise the ATP binding site[28]. (C) Alignment of the *HsXPB* substructure bound to duplex DNA from the *HsPIC* structure[17] (PDB: 5ivw) with *HsXPB* substructure from apo, core-*HsTFIIH* structure[27] (PDB: 6o9m; blue) using Chimera[42]. Residue C342 is shown space filled and becomes less exposed in the DNA bound structure.

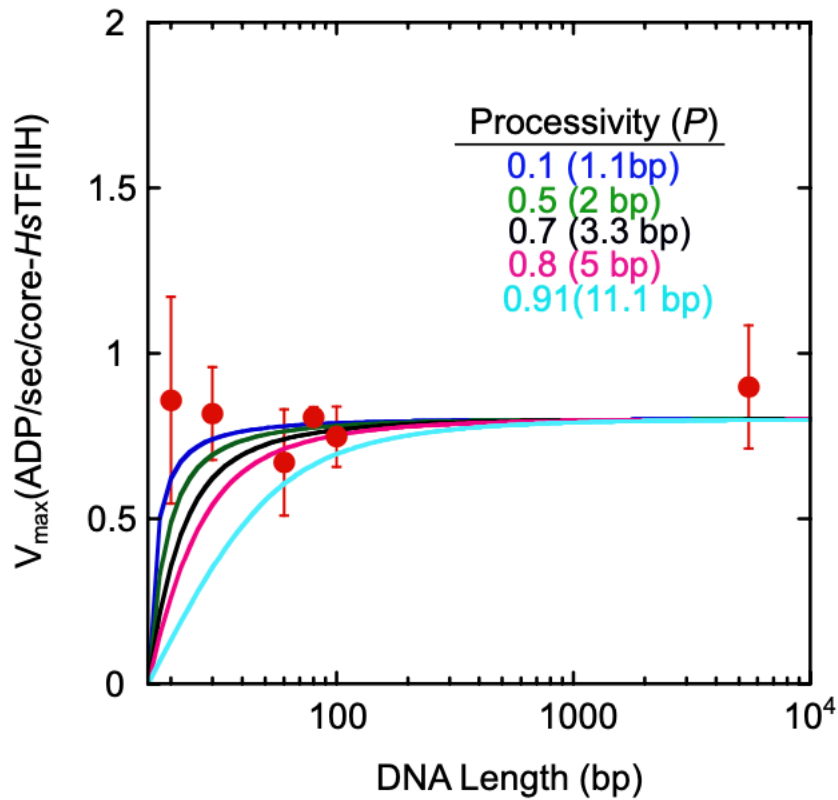

**Figure S2. Estimating an upper limit on *Hs*TFIIH dsDNA translocation processivity.** A series of  $V_{\max}$  length dependencies calculated from equation (1) using different processivities ( $P$ ) are plotted along with the observed core-*Hs*TFIIH  $V_{\max}$  values. The  $V_{\max}$  length dependencies for  $P = 0.1$  and  $0.5$  are within the error of all the observed  $V_{\max}$  values, indicating both are consistent with the data. Thus, an upper limit on the translocation processivity is  $0.5$  (i.e.  $\sim 2$  bp translocated on average per binding event).
